# Supplementary material for: Silencing LncRNA CASC9 inhibits proliferation and invasion of colorectal cancer cells by MiR-542-3p/ILK
Source: PubMed Central journal article supplement (PMC9012350; doi:10.1371/journal.pone.0265901), 2022-04-15

1. EDU

(1) Fig2D

Hoechst:

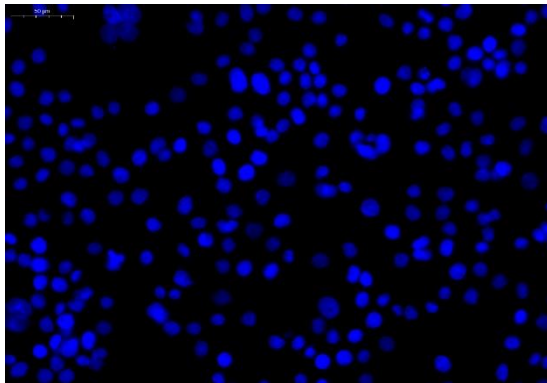

SW620-sh-NC

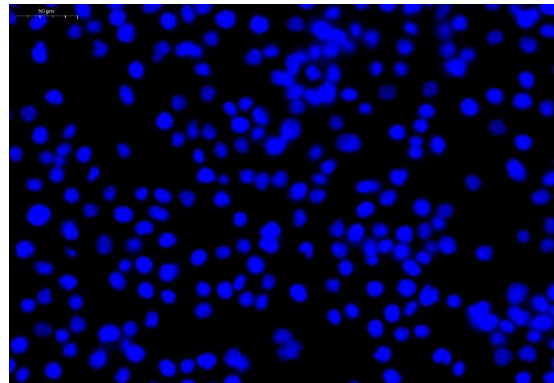

SW620-sh-CASC9-2

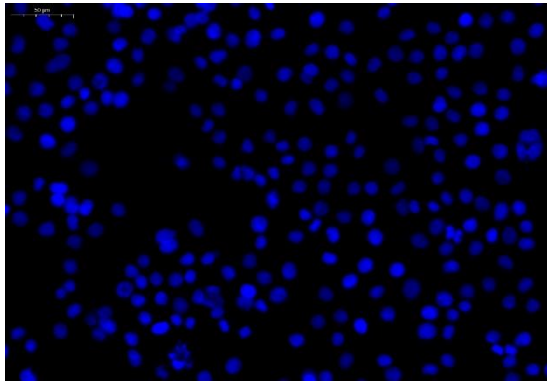

HCT116-sh-NC

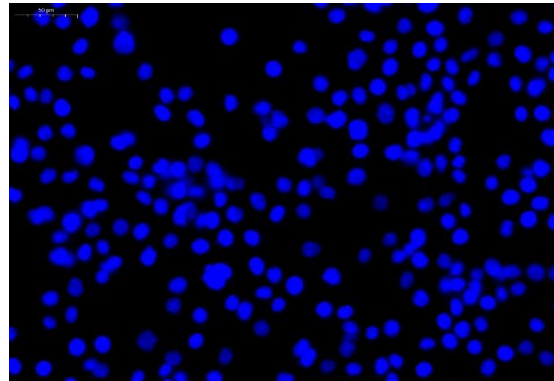

HCT116-sh-CASC9-2

EdU:

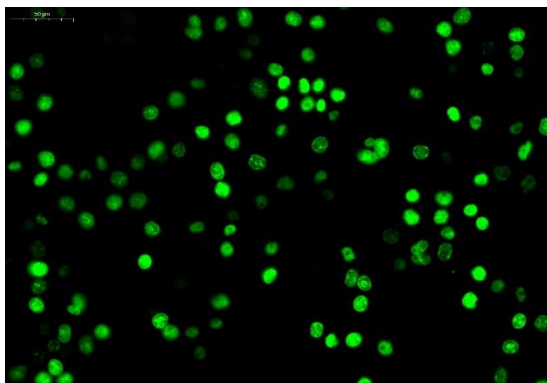

SW620-sh-NC

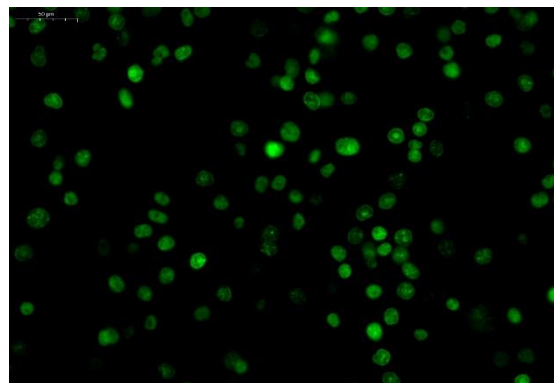

SW620-sh-CASC9-2

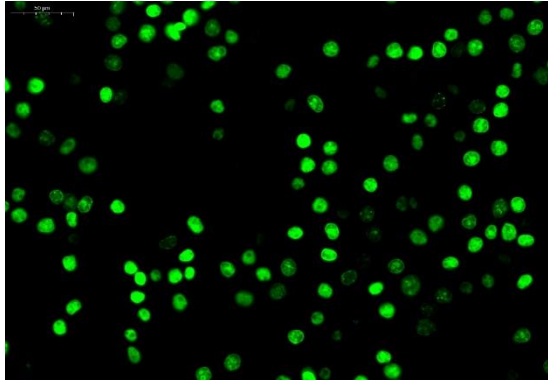

HCT116-sh-NC

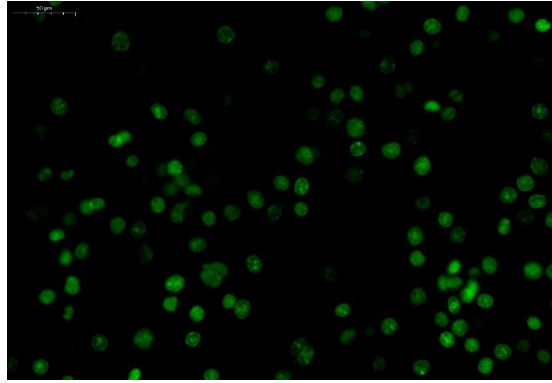

HCT116-sh-CASC9-2

**Merge:**

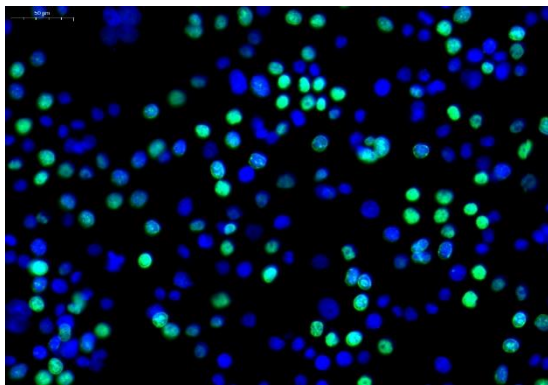

SW620-sh-NC

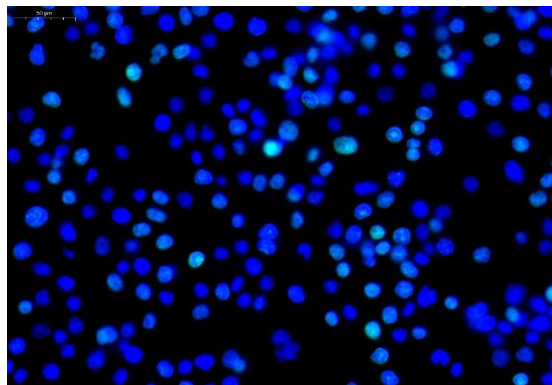

SW620-sh-CASC9-2

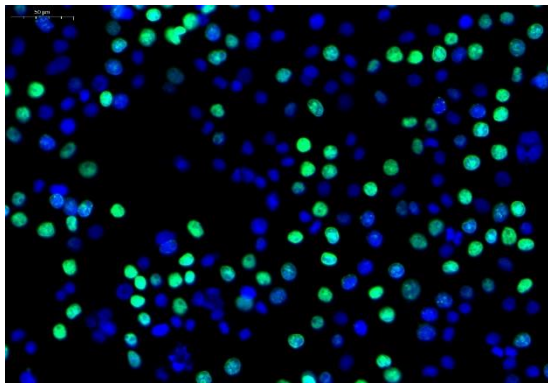

HCT116-sh-NC

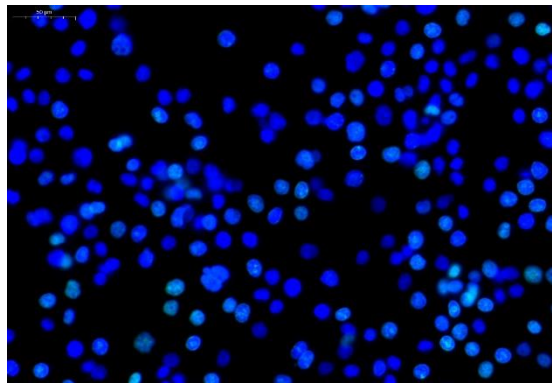

HCT116-sh-CASC9-2

**(2) Fig5D**

**Hoechst:**

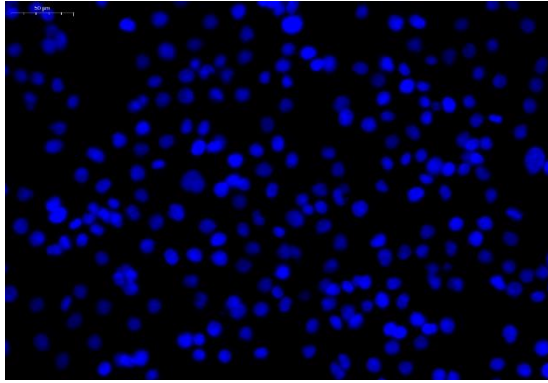

SW620-miR-NC

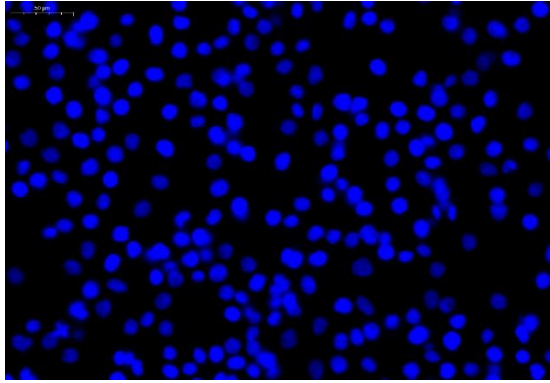

SW620-miR-542-3p mimics

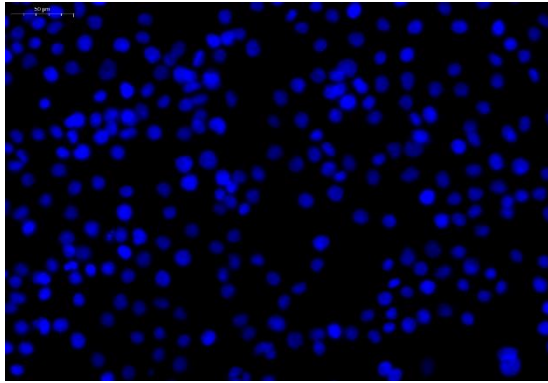

HCT116- miR-NC

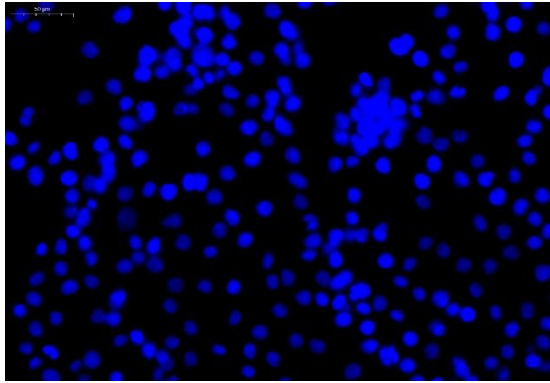

HCT116- miR-542-3p mimics

**EdU:**

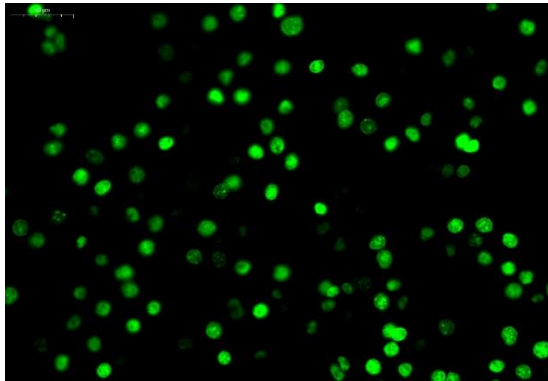

SW620-miR-NC

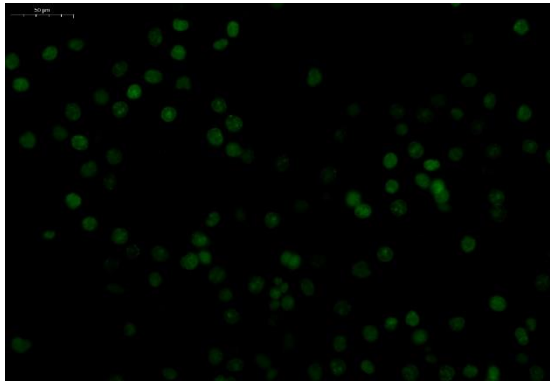

SW620-miR-542-3p mimics

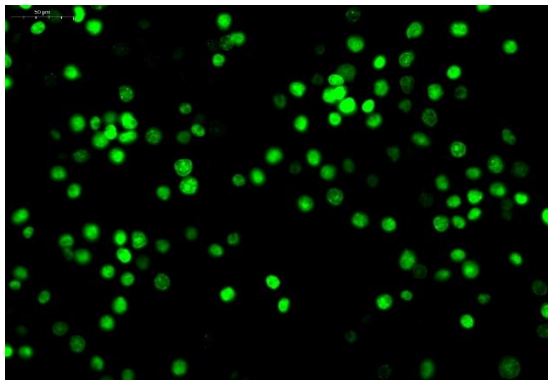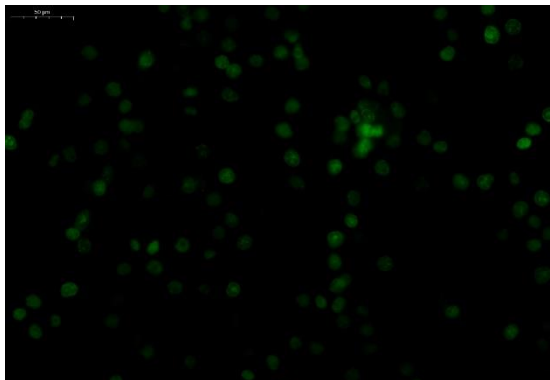



HCT116- miR-NC

HCT116- miR-542-3p mimics

Merge:

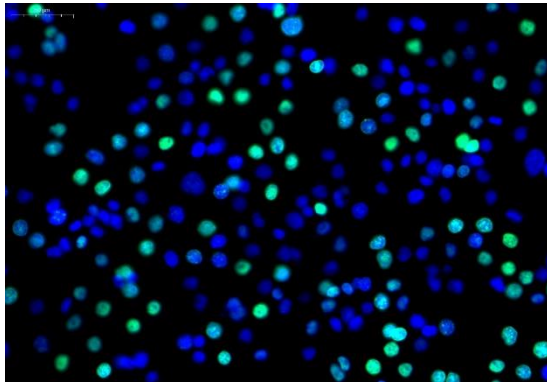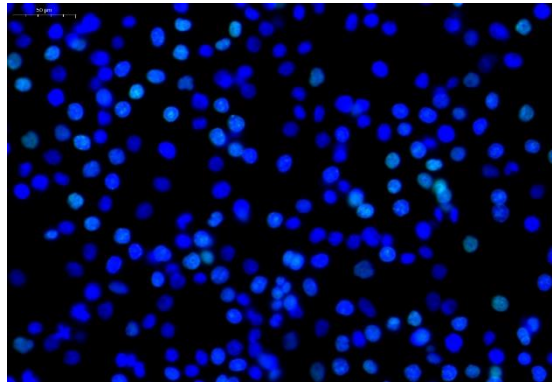

SW620-miR-NC

SW620-miR-542-3p mimics

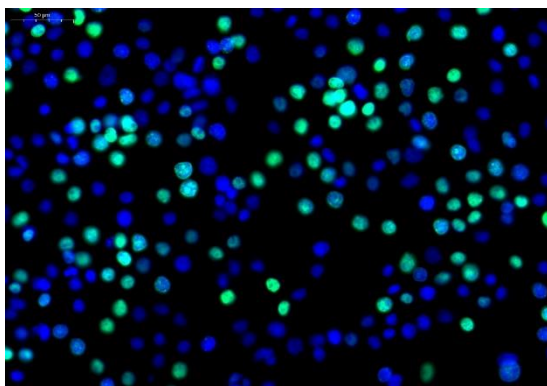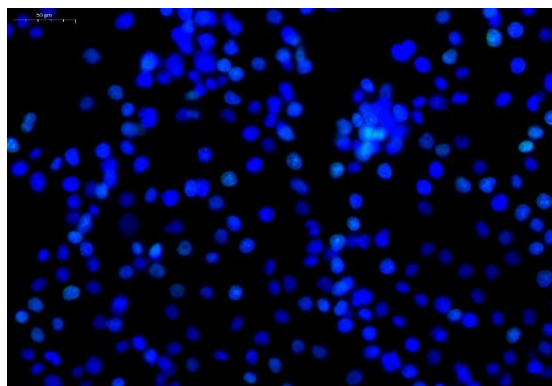

HCT116- miR-NC

HCT116- miR-542-3p mimics

(3) Fig7B

**SW620:**

Hoechst:

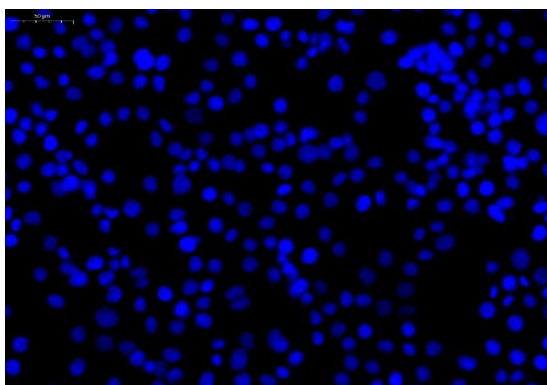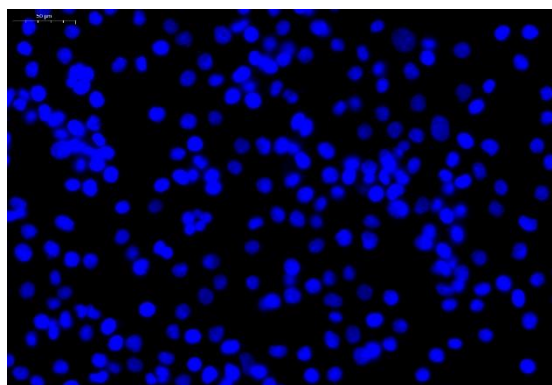

Blank

sh-CASC9-2

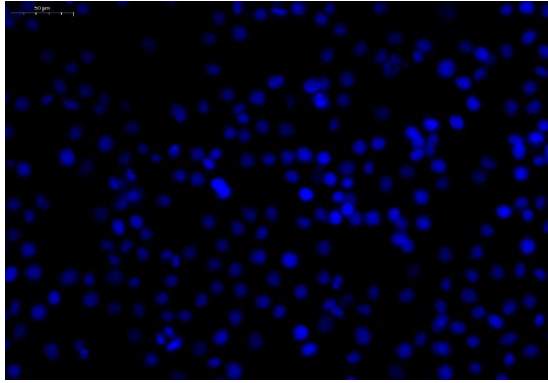

sh-CASC9-2+pcDNA3.1-ILK

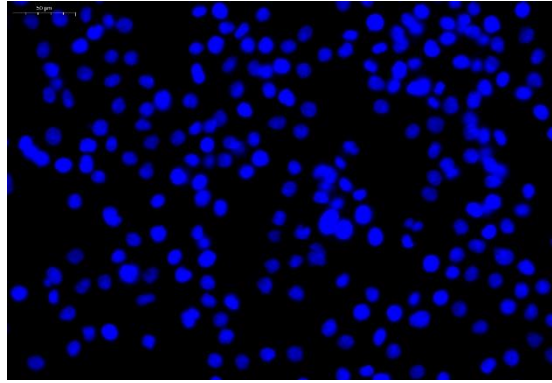

miR-542-3p mimics

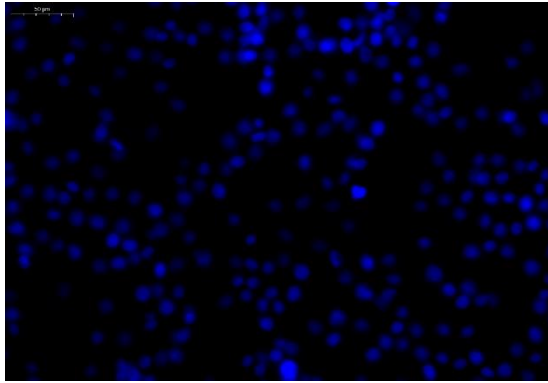

miR-542-3p mimics+ pcDNA3.1-ILK

**EdU:**

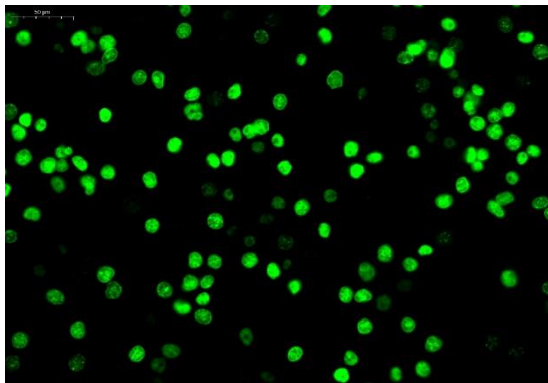

Blank

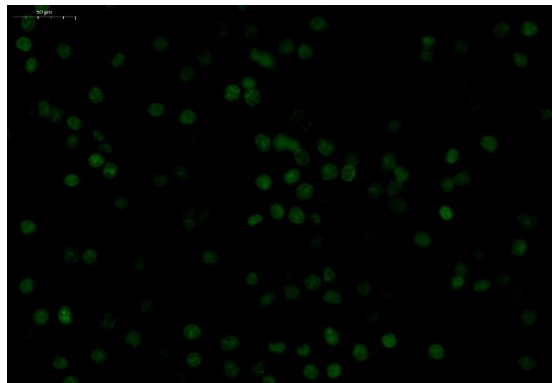

sh-CASC9-2

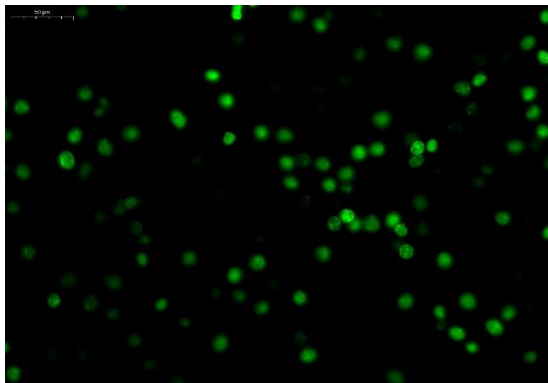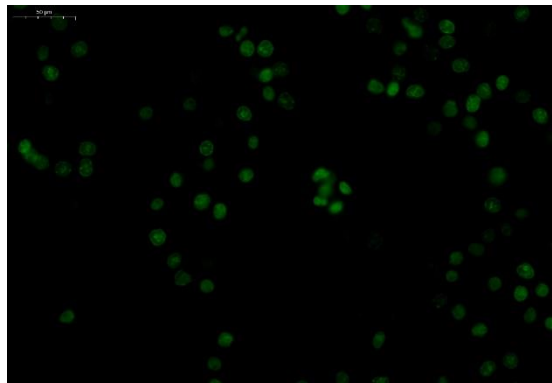

sh-CASC9-2+pcDNA3.1-ILK

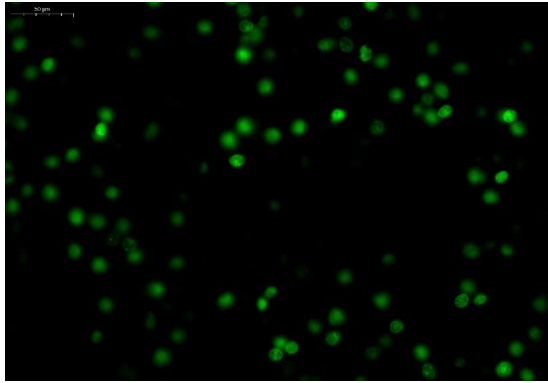

miR-542-3p mimics

miR-542-3p mimics+ pcDNA3.1-ILK

**Merge:**

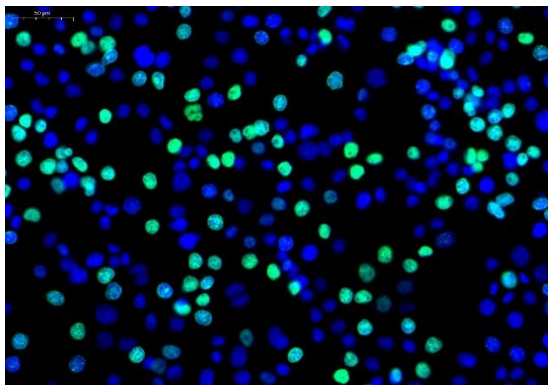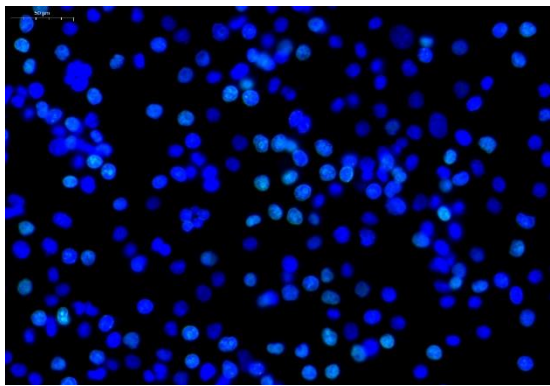

Blank

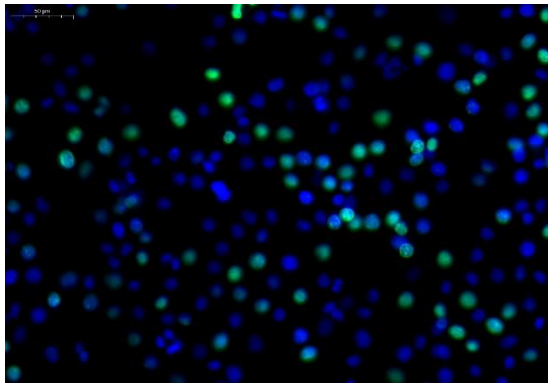

sh-CASC9-2

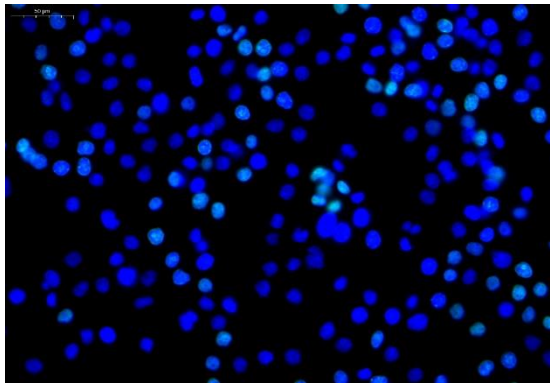

sh-CASC9-2+pcDNA3.1-ILK

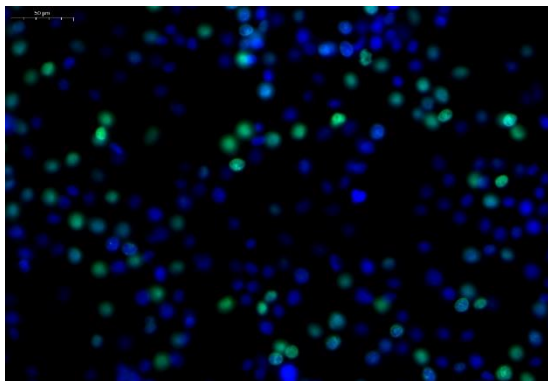

miR-542-3p mimics

miR-542-3p mimics+ pcDNA3.1-ILK

**HCT-116:**

**Hoechst:**

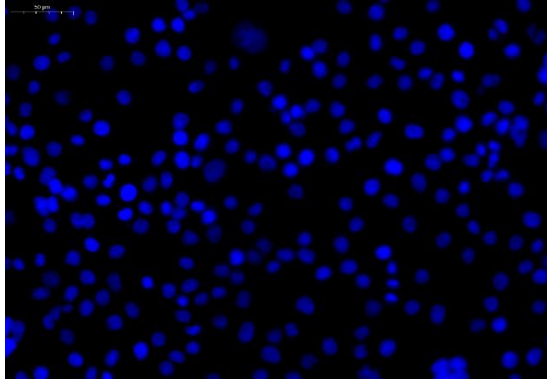

Blank

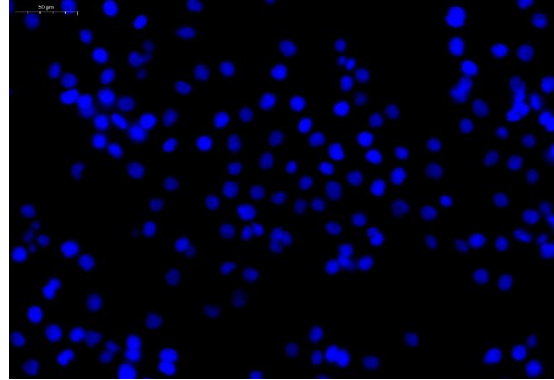

sh-CASC9-2

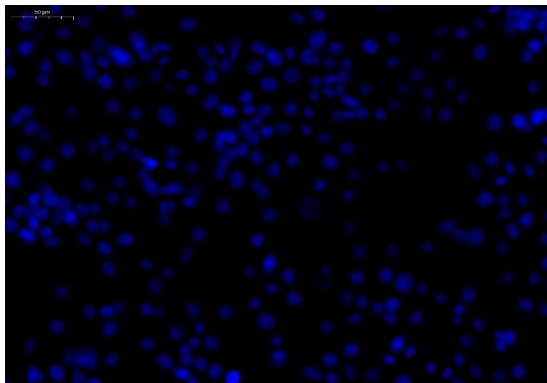

sh-CASC9-2+pcDNA3.1-ILK

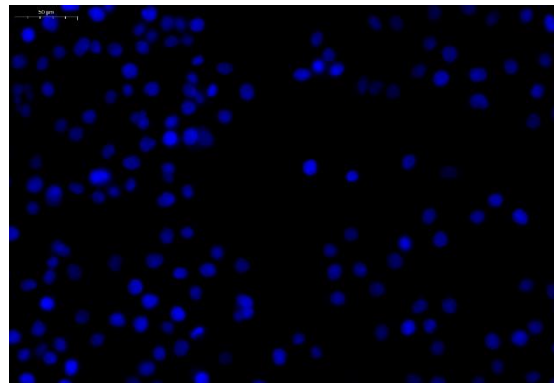

miR-542-3p mimics

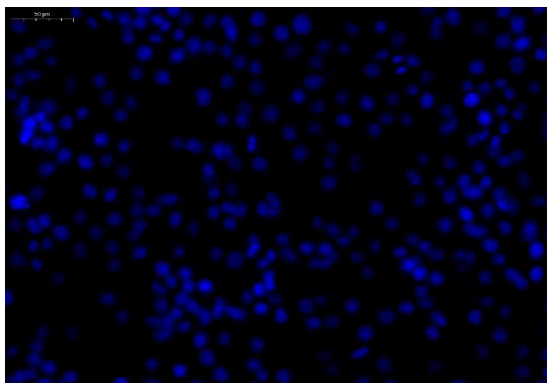

miR-542-3p mimics+ pcDNA3.1-ILK

**EdU:**



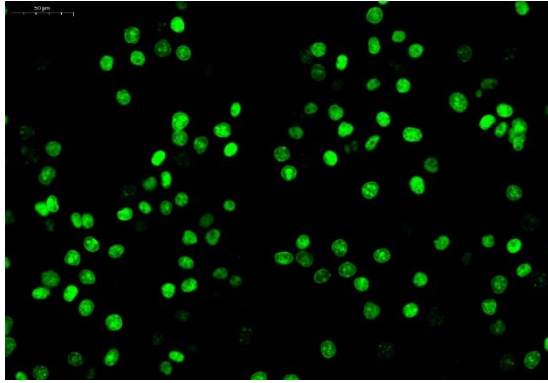

Blank

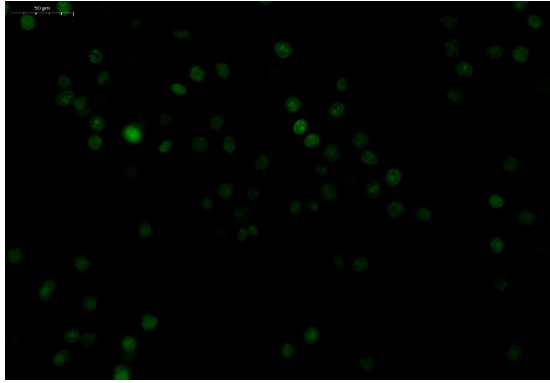

sh-CASC9-2

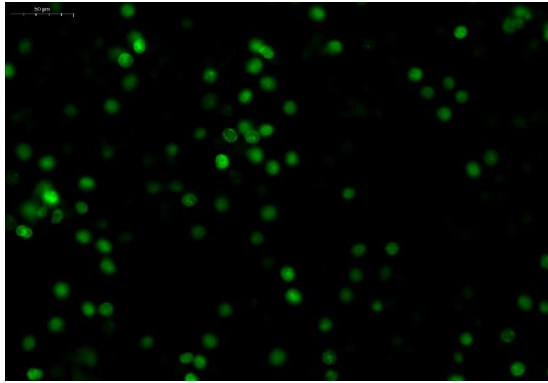

sh-CASC9-2+pcDNA3.1-ILK

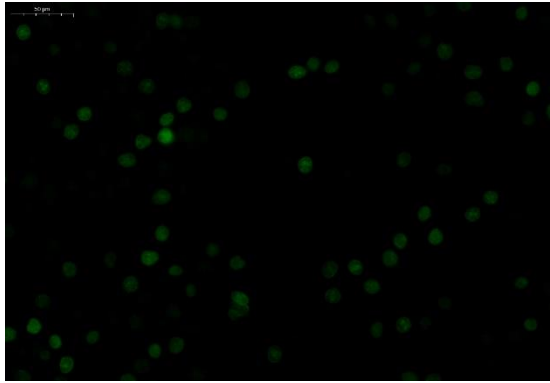

miR-542-3p mimics

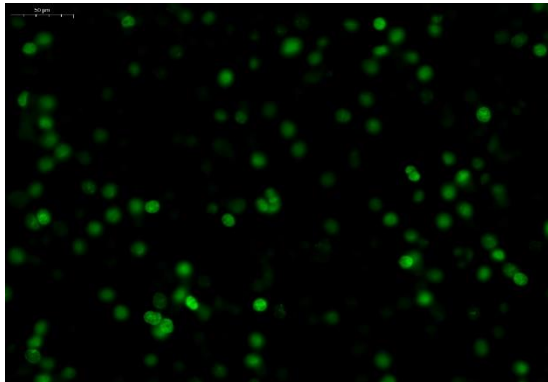

miR-542-3p mimics+ pcDNA3.1-ILK

**Merge:**

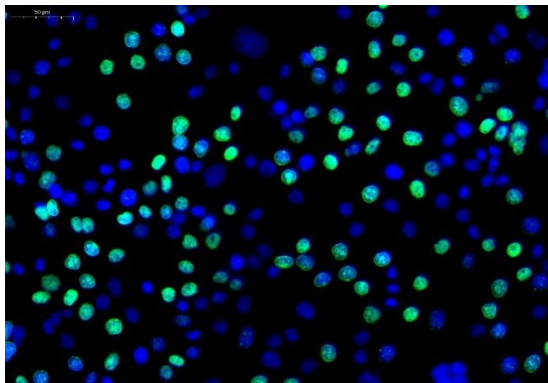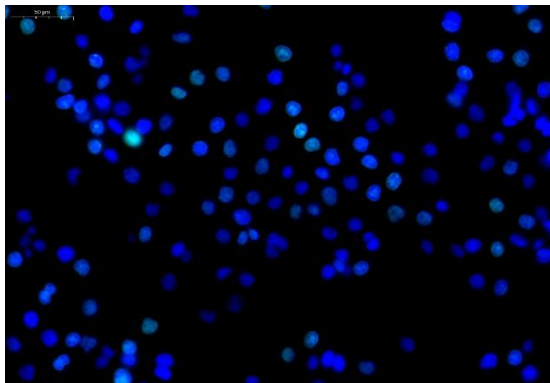



Blank

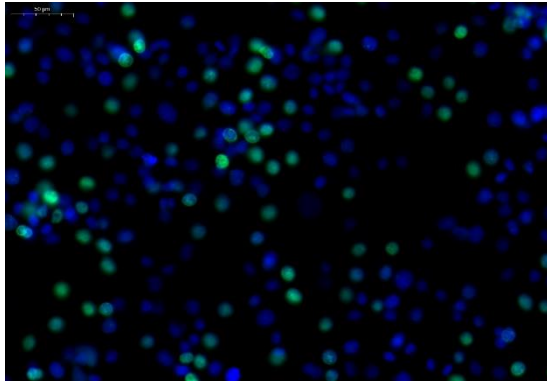

sh-CASC9-2

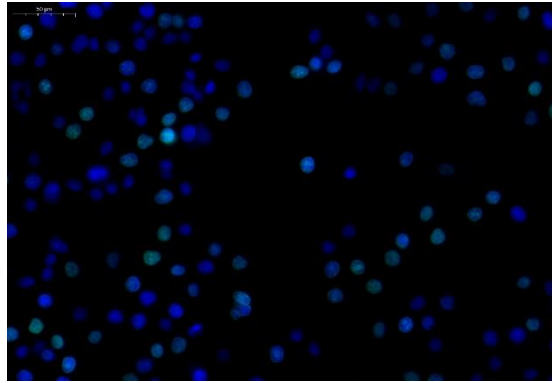

sh-CASC9-2+pcDNA3.1-ILK

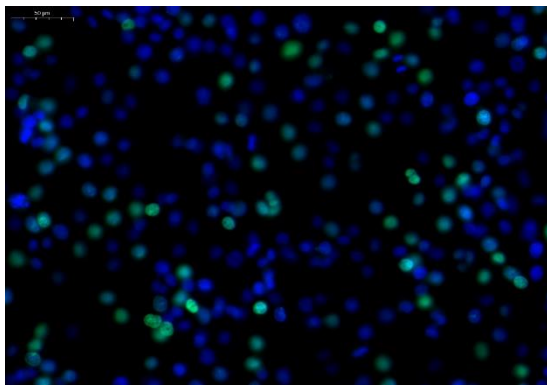

miR-542-3p mimics

miR-542-3p mimics+ pcDNA3.1-ILK

## 2. Xenograft tumors (Fig3A)

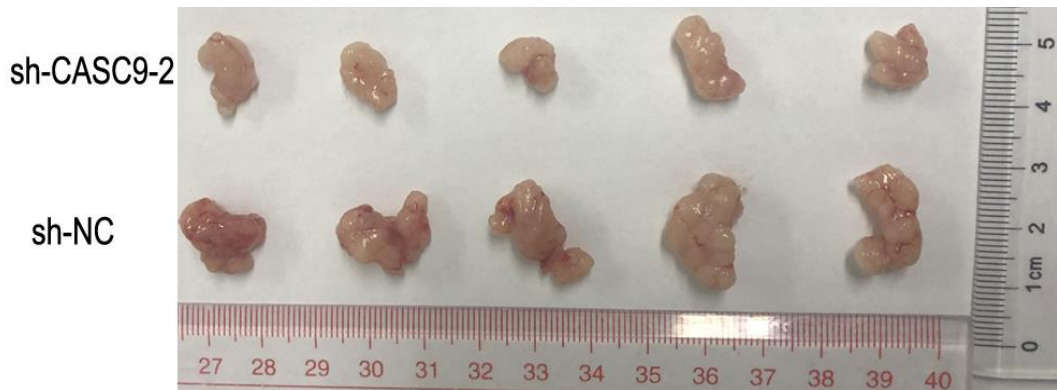

## 3. Transwell (Fig2E&F, Fig5E&F, Fig7A)

(1) Fig2E&F

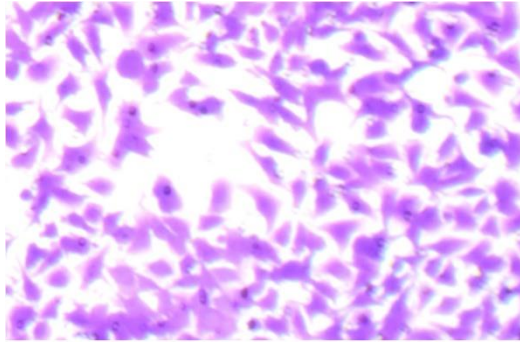

Fig2 SW620 Invasion sh-NC

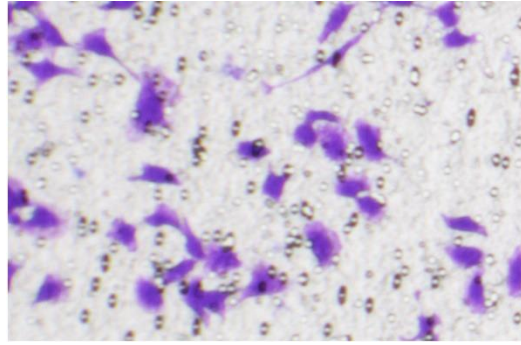

Fig2 SW620 Invasion sh-CASC9-2

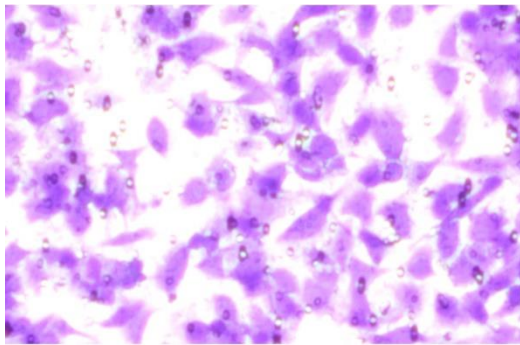

Fig2 HCT116 Invasion sh-NC

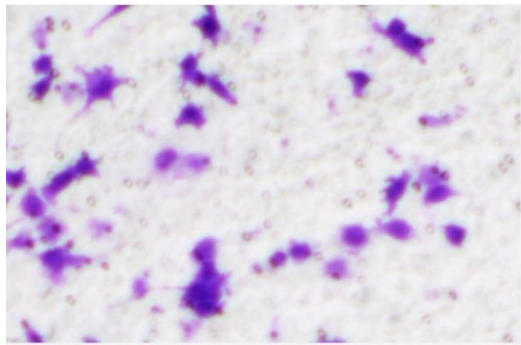

Fig2 HCT116 Invasion sh-CASC9-2

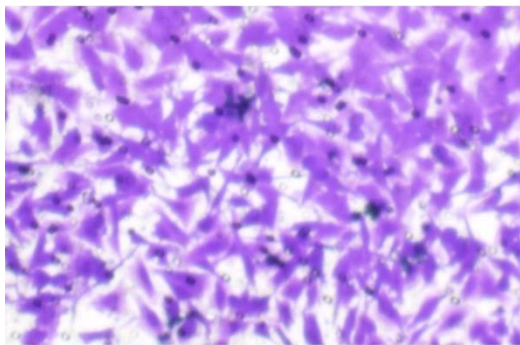

Fig2 SW620 Migration sh-NC

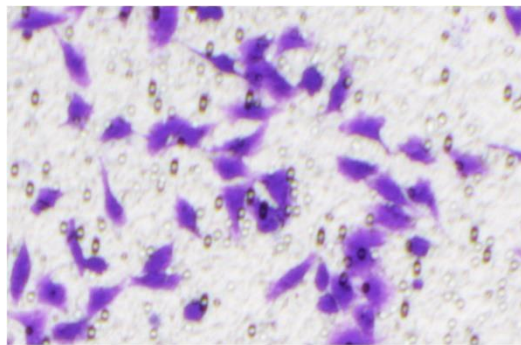

Fig2 SW620 Migration sh-CASC9-2

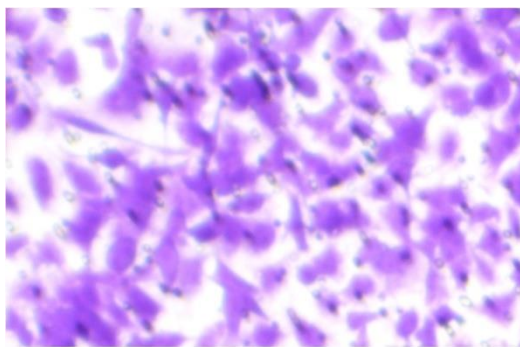

Fig2 HCT116 Migration sh-NC

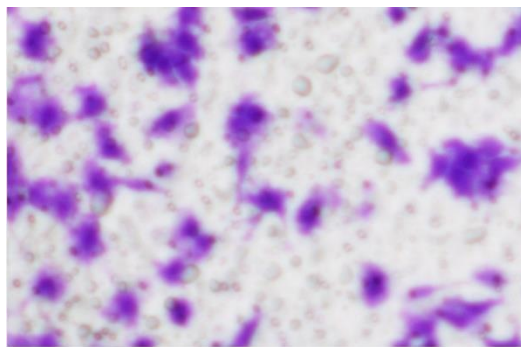

Fig2 HCT116 Migration sh-CASC9-2

(2) Fig5E&F



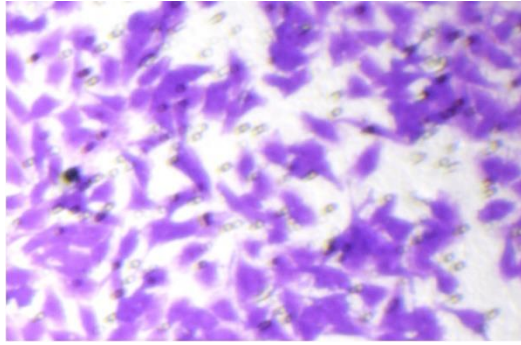

Fig5 SW620 Invasion miR-NC

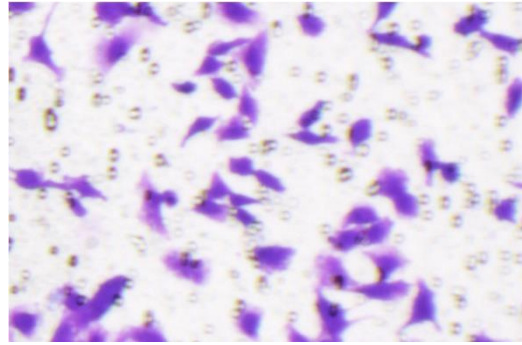

Fig5 SW620 Invasion miR-542-3p mimics

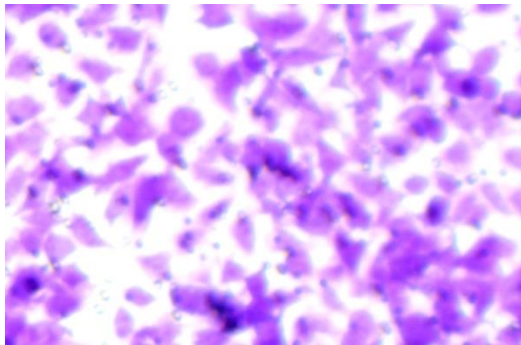

Fig5 HCT116 Invasion miR-NC

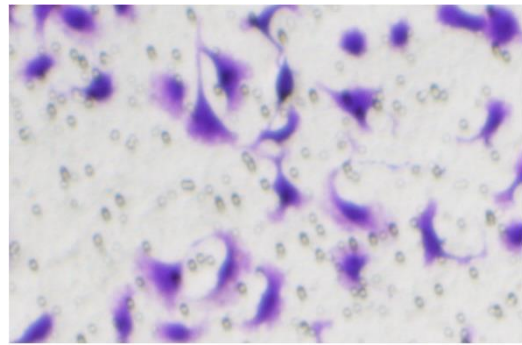

Fig5 HCT116 Invasion miR-542-3p mimics

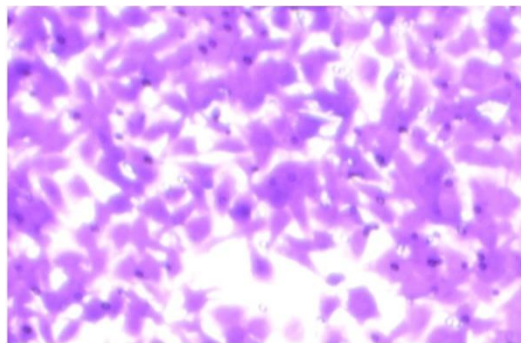

Fig5 SW620 Migration miR-NC

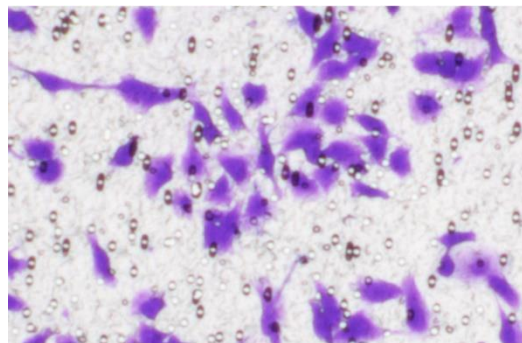

Fig5 SW620 Migration miR-542-3p mimics

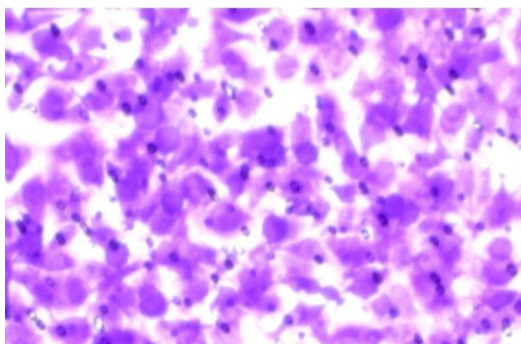

Fig5 HCT116 Migration miR-NC

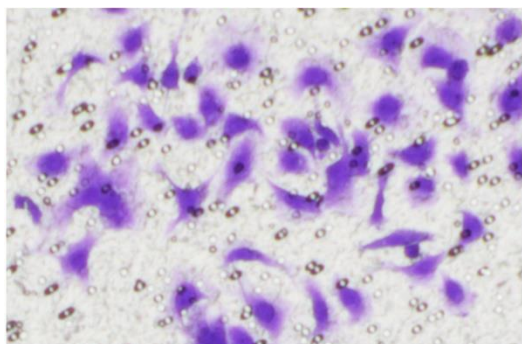

Fig5 HCT116 Migration miR-542-3p mimics

(3) Fig7A

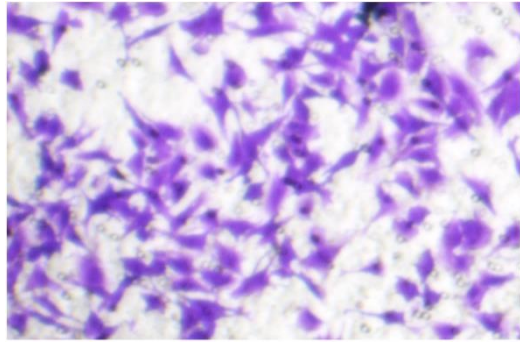

Fig7 SW620 Invasion Blank

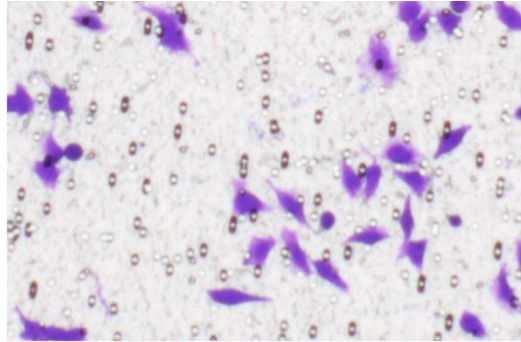

Fig7 SW620 Invasion sh-CASC9-2

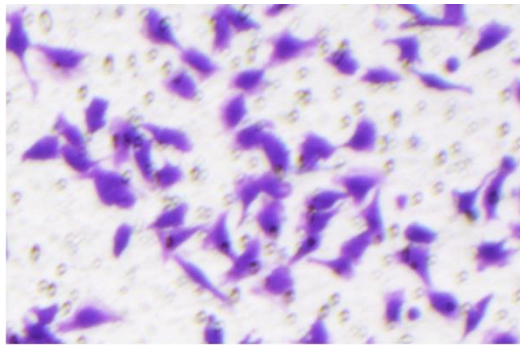

Fig7 SW620 Invasion sh-CASC9-2+pcDNA3.1-ILK

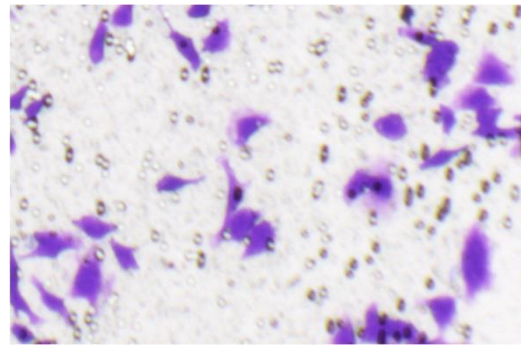

Fig7 SW620 Invasion miR-542-3p mimics

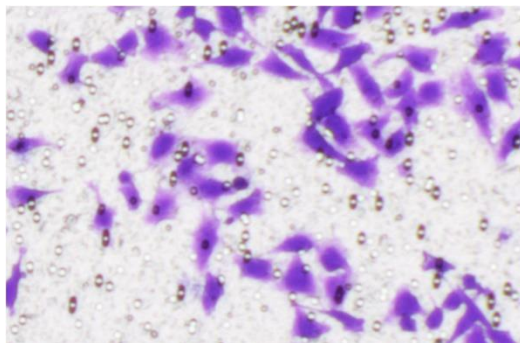

Fig7 SW620 Invasion miR-542-3p mimics+ pcDNA3.1-ILK

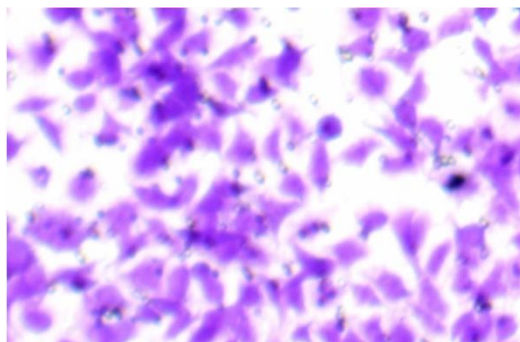

Fig7 HCT116 Invasion Blank

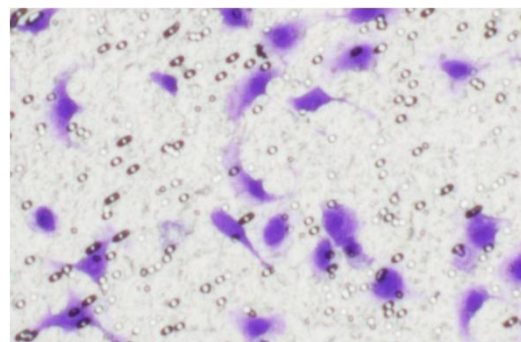

Fig7 HCT116 Invasion sh-CASC9-2



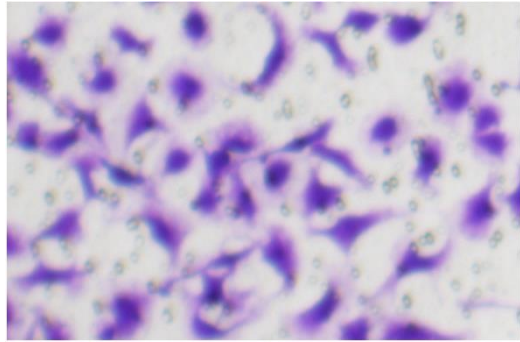

Fig7 HCT116 Invasion sh-CASC9-2+pcDNA3.1-ILK

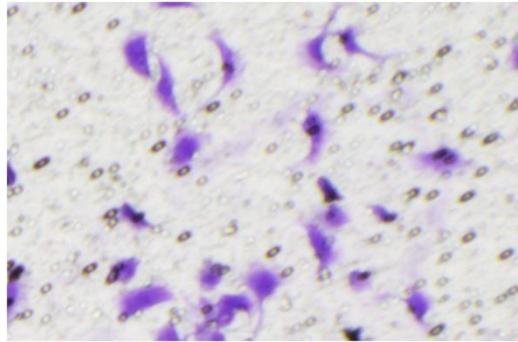

Fig7 HCT116 Invasion miR-542-3p mimics

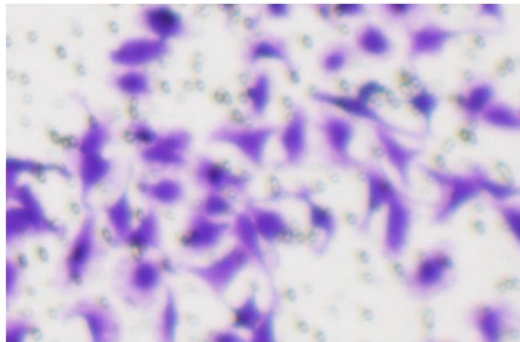

Fig7 HCT116 Invasion miR-542-3p mimics + pcDNA3.1-ILK

#### 4. IHC (Fig3C&D)

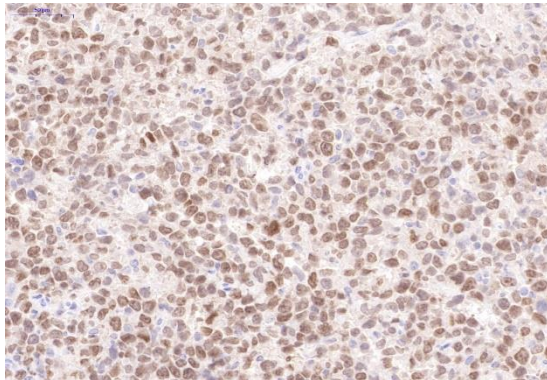

Ki67-40.0x-sh-NC

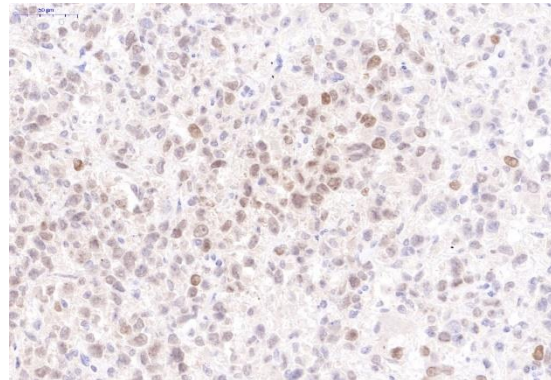

Ki67-40.0x-sh-CASC9-2

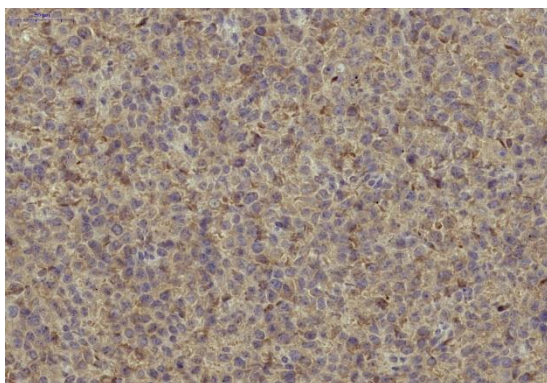

MMP2-40.0x-sh-NC

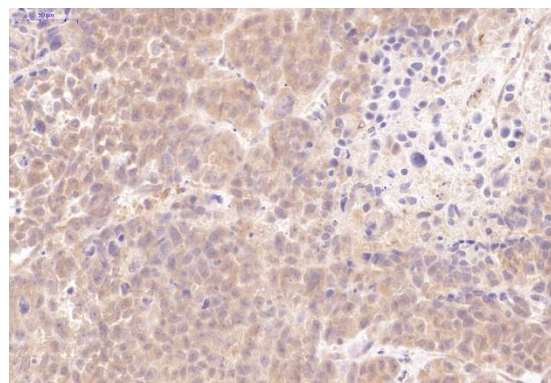

MMP2-40.0x-sh-CASC9-2

5. WB (Fig6C)

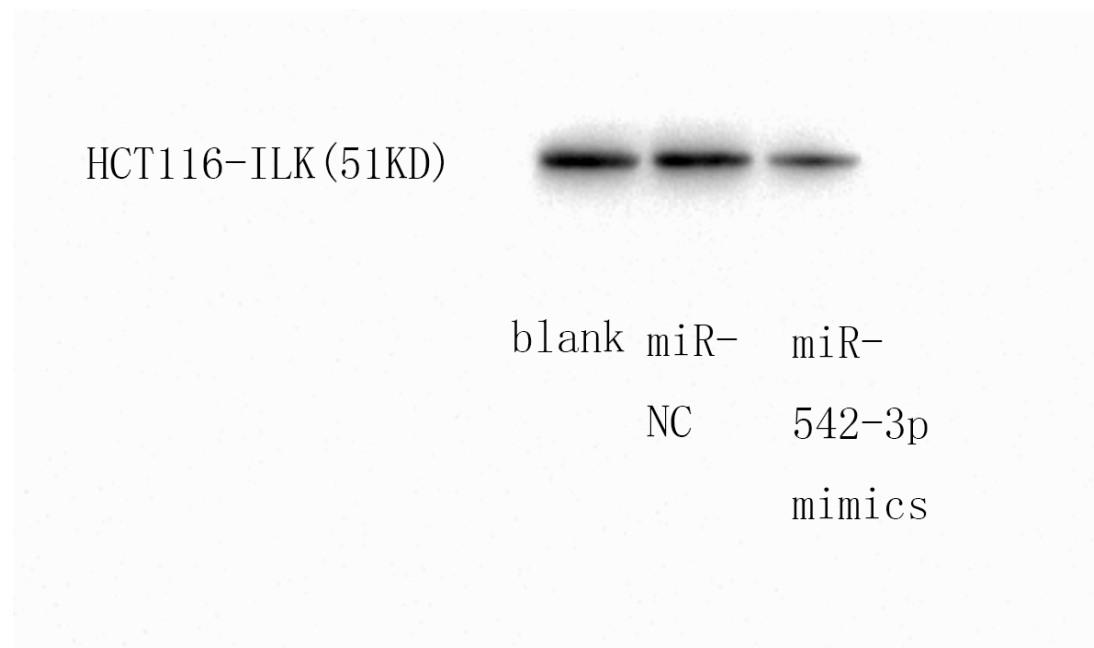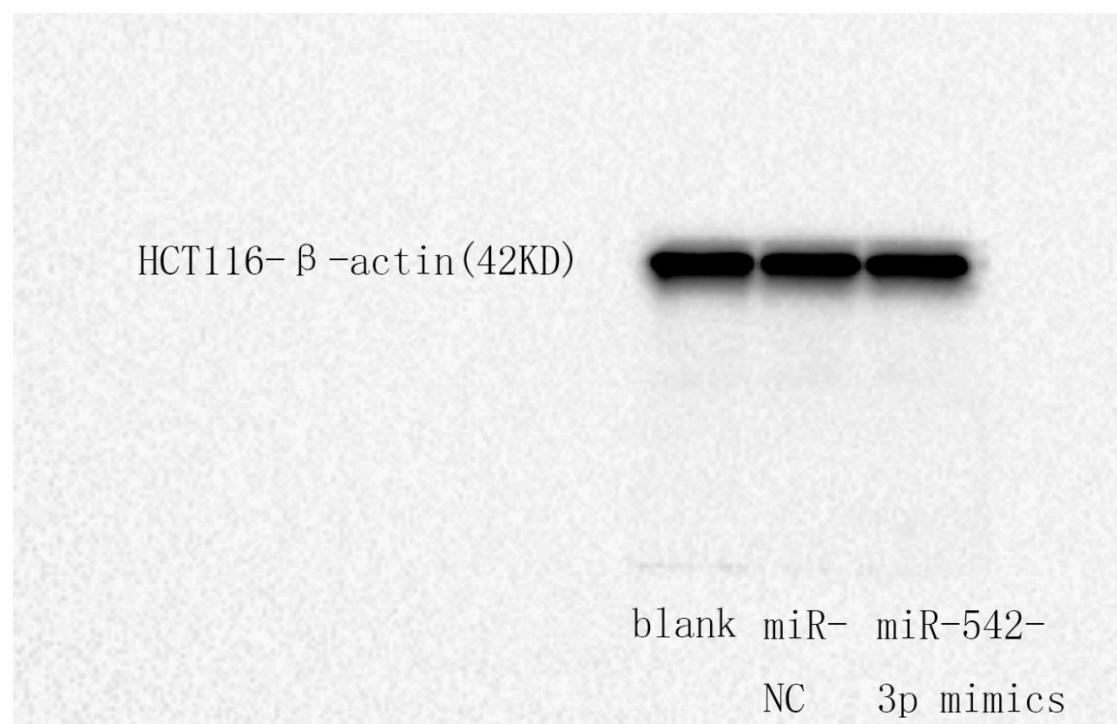

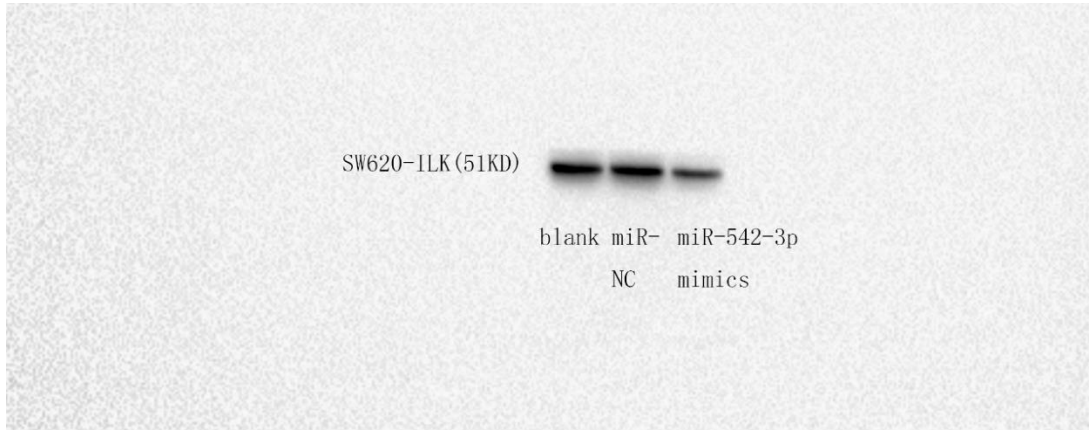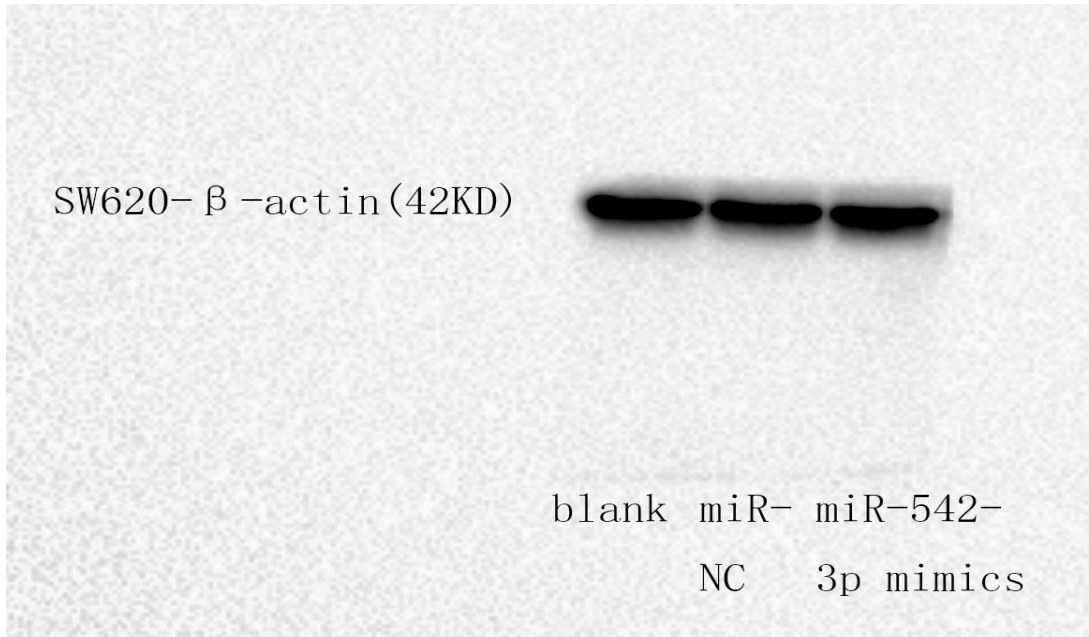

Supplement: pone.0265901.s001.pdf [file pone.0265901.s001.pdf]
