# Supplementary material for: Silencing LncRNA CASC9 inhibits proliferation and invasion of colorectal cancer cells by MiR-542-3p/ILK
Source: PubMed Central journal article supplement (PMC9012350; doi:10.1371/journal.pone.0265901), 2022-04-15
Supplement: pone.0265901.s002.pdf [file pone.0265901.s002.pdf]

| Fig1A | Fig1B    |         | Fig1C  |       |        |
|-------|----------|---------|--------|-------|--------|
| T/N   | TNM I&II | TNM III | NCM460 | SW620 | HCT116 |
| -3.4  | 0.09     | 0.16    | 1      | 18.94 | 17.53  |
| -2.6  | 0.22     | 0.57    | 0.92   | 22.31 | 15.23  |
| -2.2  | 0.23     | 0.62    | 1.08   | 17.68 | 19.41  |
| -2.1  | 0.33     | 0.97    | 0.93   | 23.18 | 17.62  |
| -1.6  | 0.34     | 1.32    | 1.07   | 19.03 | 17.66  |
| -1.6  | 0.59     | 1.74    |        |       |        |
| -0.8  | 0.87     | 2.46    |        |       |        |
| -0.8  | 1.00     | 2.50    |        |       |        |
| -0.7  | 1.23     | 4.29    |        |       |        |
| -0.2  | 1.37     | 5.28    |        |       |        |
| -0.1  | 2.00     | 6.96    |        |       |        |
| 0.0   | 2.30     | 9.19    |        |       |        |
| 0.3   | 2.30     | 10.56   |        |       |        |
| 0.4   | 2.83     | 12.55   |        |       |        |
| 0.5   | 3.73     | 13.00   |        |       |        |
| 0.8   | 5.28     | 25.99   |        |       |        |
| 1.0   | 6.50     | 48.50   |        |       |        |
| 1.2   | 12.13    |         |        |       |        |
| 1.2   | 21.11    |         |        |       |        |
| 1.3   |          |         |        |       |        |
| 1.3   |          |         |        |       |        |
| 1.5   |          |         |        |       |        |
| 1.9   |          |         |        |       |        |
| 2.1   |          |         |        |       |        |
| 2.4   |          |         |        |       |        |
| 2.4   |          |         |        |       |        |
| 2.7   |          |         |        |       |        |
| 2.8   |          |         |        |       |        |
| 3.2   |          |         |        |       |        |
| 3.4   |          |         |        |       |        |
| 3.6   |          |         |        |       |        |
| 3.7   |          |         |        |       |        |
| 3.7   |          |         |        |       |        |
| 4.4   |          |         |        |       |        |
| 4.7   |          |         |        |       |        |
| 5.6   |          |         |        |       |        |

| Fig2A    |       |      |   |        |      |   |
|----------|-------|------|---|--------|------|---|
|          | SW620 |      |   | HCT116 |      |   |
|          | Mean  | SD   | N | Mean   | SD   | N |
| sh-NC    | 1     | 0.05 | 5 | 1      | 0.06 | 5 |
| sh-CASC9 | 0.72  | 0.04 | 5 | 0.64   | 0.04 | 5 |
| sh-CASC9 | 0.32  | 0.02 | 5 | 0.36   | 0.02 | 5 |
| sh-CASC9 | 0.57  | 0.03 | 5 | 0.71   | 0.05 | 5 |

  

| Fig2B |       |       |   |            |       |   |
|-------|-------|-------|---|------------|-------|---|
|       | sh-NC |       |   | sh-CASC9-2 |       |   |
|       | Mean  | SD    | N | Mean       | SD    | N |
| 0h    | 0.25  | 0.03  | 3 | 0.25       | 0.03  | 3 |
| 24h   | 0.32  | 0.034 | 3 | 0.28       | 0.04  | 3 |
| 48h   | 0.62  | 0.07  | 3 | 0.41       | 0.045 | 3 |
| 72h   | 1.08  | 0.105 | 3 | 0.64       | 0.07  | 3 |

  

| Fig2C |       |      |   |            |      |   |
|-------|-------|------|---|------------|------|---|
|       | sh-NC |      |   | sh-CASC9-2 |      |   |
|       | Mean  | SD   | N | Mean       | SD   | N |
| 0h    | 0.22  | 0.03 | 3 | 0.22       | 0.03 | 3 |

|     |      |       |   |      |       |   |
|-----|------|-------|---|------|-------|---|
| 24h | 0.3  | 0.034 | 3 | 0.29 | 0.04  | 3 |
| 48h | 0.55 | 0.07  | 3 | 0.38 | 0.045 | 3 |
| 72h | 1.01 | 0.105 | 3 | 0.63 | 0.07  | 3 |

| Fig2D2   |      |     |        |      |     |   |
|----------|------|-----|--------|------|-----|---|
| SW620    |      |     | HCT116 |      |     |   |
|          | Mean | SD  | N      | Mean | SD  | N |
| sh-NC    | 41.1 | 4.8 | 3      | 39.4 | 4.9 | 3 |
| sh-CASC9 | 15.7 | 2.1 | 3      | 13.5 | 1.8 | 3 |

| Fig2E2   |       |      |        |       |      |   |
|----------|-------|------|--------|-------|------|---|
| SW620    |       |      | HCT116 |       |      |   |
|          | Mean  | SD   | N      | Mean  | SD   | N |
| sh-NC    | 223.5 | 26.2 | 3      | 167.2 | 19.6 | 3 |
| sh-CASC9 | 47.2  | 6.8  | 3      | 44.3  | 6.7  | 3 |

| Fig2F2   |       |     |        |      |      |   |
|----------|-------|-----|--------|------|------|---|
| SW620    |       |     | HCT116 |      |      |   |
|          | Mean  | SD  | N      | Mean | SD   | N |
| sh-NC    | 172.2 | 21  | 3      | 123  | 17.6 | 3 |
| sh-CASC9 | 41    | 6.1 | 3      | 32   | 5.6  | 3 |

| Fig3A2 |       |     |   |            |     |   |
|--------|-------|-----|---|------------|-----|---|
|        | sh-NC |     |   | sh-CASC9-2 |     |   |
|        | Mean  | SD  | N | Mean       | SD  | N |
| 1w     | 162   | 20  | 5 | 75         | 13  | 5 |
| 2w     | 286   | 42  | 5 | 147        | 28  | 5 |
| 3w     | 527   | 102 | 5 | 220        | 62  | 5 |
| 4w     | 948   | 231 | 5 | 374        | 102 | 5 |

| Fig3B  |            | Fig3C2 |            | Fig3D2 |            |
|--------|------------|--------|------------|--------|------------|
| sh-NC  | sh-CASC9-2 | sh-NC  | sh-CASC9-2 | sh-NC  | sh-CASC9-2 |
| 878    | 346.1      | 105    | 42         | 105    | 72         |
| 972    | 192.1      | 108    | 30         | 107    | 60         |
| 669.2  | 334.5      | 92     | 41         | 93     | 76         |
| 1066.1 | 316.1      | 94     | 32         | 94     | 59         |
| 589.6  | 442.3      | 101    | 30         | 101    | 79         |

| Fig3E |            | Fig3F |            | Fig3G  |            |
|-------|------------|-------|------------|--------|------------|
| sh-NC | sh-CASC9-2 | sh-NC | sh-CASC9-2 | miR-NC | sh-CASC9-2 |
| 1.0   | 0.3        | 0.8   | 3.5        | 1      | 0.45       |
| 0.9   | 0.4        | 1.0   | 4.0        | 1.01   | 0.37       |
| 1.1   | 0.3        | 1.0   | 3.5        | 1.17   | 0.45       |
| 1.0   | 0.2        | 1.1   | 3.1        | 0.95   | 0.4        |
| 1.0   | 0.3        | 1.1   | 3.4        | 0.87   | 0.58       |

| Fig4B            |      |      |                   |      |      |   |
|------------------|------|------|-------------------|------|------|---|
| pmirGLO-CASC9-Wt |      |      | pmirGLO-CASC9-Mut |      |      |   |
|                  | Mean | SD   | N                 | Mean | SD   | N |
| miR-NC           | 1    | 0.06 | 5                 | 1.02 | 0.07 | 5 |
| miR-542-3p       | 0.56 | 0.03 | 5                 | 1.04 | 0.06 | 5 |

| Fig4C      |      |      |      |      |      |   |
|------------|------|------|------|------|------|---|
| IgG        |      |      | Ago2 |      |      |   |
|            | Mean | SD   | N    | Mean | SD   | N |
| LncRNA C.  | 1    | 0.07 | 3    | 14.7 | 1.12 | 3 |
| miR-542-3p | 1    | 0.06 | 3    | 23.4 | 1.89 | 3 |

| Fig4D      |      |      |      |      |      |   |
|------------|------|------|------|------|------|---|
| IgG        |      |      | Ago2 |      |      |   |
|            | Mean | SD   | N    | Mean | SD   | N |
| LncRNA C.  | 1    | 0.05 | 3    | 9.2  | 0.72 | 3 |
| miR-542-3p | 1    | 0.07 | 3    | 18.7 | 1.32 | 3 |

| Fig4E |  |  |        |  |  |  |
|-------|--|--|--------|--|--|--|
| SW620 |  |  | HCT116 |  |  |  |

|          | Mean | SD   | N | Mean | SD   | N |
|----------|------|------|---|------|------|---|
| sh-NC    | 1    | 0.05 | 3 | 1    | 0.07 | 3 |
| sh-CASC9 | 3.42 | 0.31 | 3 | 3.12 | 0.28 | 3 |

Fig5A

|            | SW620 |      |   | HCT116 |      |   |
|------------|-------|------|---|--------|------|---|
|            | Mean  | SD   | N | Mean   | SD   | N |
| miR-NC     | 1     | 0.05 | 5 | 1      | 0.06 | 5 |
| miR-542-3p | 8.3   | 0.52 | 5 | 7.8    | 0.47 | 5 |

Fig5B

|     | miR-NC |       |   | miR-542-3p mimics |       |   |
|-----|--------|-------|---|-------------------|-------|---|
|     | Mean   | SD    | N | Mean              | SD    | N |
| 0h  | 0.21   | 0.03  | 3 | 0.21              | 0.03  | 3 |
| 24h | 0.28   | 0.034 | 3 | 0.27              | 0.04  | 3 |
| 48h | 0.57   | 0.07  | 3 | 0.54              | 0.05  | 3 |
| 72h | 1.14   | 0.12  | 3 | 0.82              | 0.085 | 3 |

Fig5C

|     | miR-NC |       |   | miR-542-3p mimics |       |   |
|-----|--------|-------|---|-------------------|-------|---|
|     | Mean   | SD    | N | Mean              | SD    | N |
| 0h  | 0.25   | 0.03  | 3 | 0.25              | 0.03  | 3 |
| 24h | 0.38   | 0.034 | 3 | 0.32              | 0.04  | 3 |
| 48h | 0.82   | 0.08  | 3 | 0.54              | 0.06  | 3 |
| 72h | 1.09   | 0.11  | 3 | 0.67              | 0.085 | 3 |

Fig5D2

|            | SW620 |     |   | HCT116 |     |   |
|------------|-------|-----|---|--------|-----|---|
|            | Mean  | SD  | N | Mean   | SD  | N |
| miR-NC     | 40.3  | 4   | 3 | 45     | 4.9 | 3 |
| miR-542-3p | 16.7  | 1.8 | 3 | 14.7   | 1.6 | 3 |

Fig5E2

|            | SW620 |      |   | HCT116 |      |   |
|------------|-------|------|---|--------|------|---|
|            | Mean  | SD   | N | Mean   | SD   | N |
| miR-NC     | 247   | 25.2 | 3 | 186.2  | 20.6 | 3 |
| miR-542-3p | 58.2  | 7.8  | 3 | 52.3   | 7.4  | 3 |

Fig5F2

|            | SW620 |      |   | HCT116 |      |   |
|------------|-------|------|---|--------|------|---|
|            | Mean  | SD   | N | Mean   | SD   | N |
| miR-NC     | 162.2 | 19.4 | 3 | 143    | 16.6 | 3 |
| miR-542-3p | 45.3  | 6.6  | 3 | 39.2   | 5.2  | 3 |

Fig6B

|            | pmirGLO-ILK 3'UTR-Wt |      |   | pmirGLO-ILK 3'UTR-Mut |      |   |
|------------|----------------------|------|---|-----------------------|------|---|
|            | Mean                 | SD   | N | Mean                  | SD   | N |
| miR-NC     | 1                    | 0.05 | 5 | 0.98                  | 0.06 | 5 |
| miR-542-3p | 0.52                 | 0.04 | 5 | 1.02                  | 0.06 | 5 |

Fig6C2

|            | SW620 |      |   | HCT116 |      |   |
|------------|-------|------|---|--------|------|---|
|            | Mean  | SD   | N | Mean   | SD   | N |
| Blank      | 1     | 0.08 | 3 | 1      | 0.1  | 3 |
| miR-NC     | 1.03  | 0.1  | 3 | 1.05   | 0.09 | 3 |
| miR-542-3p | 0.46  | 0.04 | 3 | 0.39   | 0.04 | 3 |

Fig7A2

|            | SW620 |      |   | HCT116 |      |   |
|------------|-------|------|---|--------|------|---|
|            | Mean  | SD   | N | Mean   | SD   | N |
| Blank      | 169.2 | 18.4 | 3 | 127.3  | 14.3 | 3 |
| sh-CASC9   | 42.3  | 5.6  | 3 | 34.5   | 4.9  | 3 |
| sh-CASC9   | 86.8  | 12.3 | 3 | 77.2   | 10.3 | 3 |
| miR-542-3p | 50.3  | 7.2  | 3 | 36.1   | 5.1  | 3 |

|            |       |      |   |        |      |   |
|------------|-------|------|---|--------|------|---|
| miR542-3p  | 92.4  | 13.2 | 3 | 83.2   | 11.7 | 3 |
| Fig7B2     |       |      |   |        |      |   |
|            | SW620 |      |   | HCT116 |      |   |
|            | Mean  | SD   | N | Mean   | SD   | N |
| Blank      | 43.2  | 3.4  | 3 | 47.6   | 3.9  | 3 |
| sh-CASC9   | 16.8  | 1.4  | 3 | 14.8   | 1.2  | 3 |
| sh-CASC9   | 31    | 2.7  | 3 | 28.3   | 2.3  | 3 |
| miR-542-3p | 17.5  | 1.4  | 3 | 14.4   | 1.4  | 3 |
| miR542-3p  | 33.3  | 3    | 3 | 25.3   | 2.1  | 3 |
