# Supplementary material for: Silencing LncRNA CASC9 inhibits proliferation and invasion of colorectal cancer cells by MiR-542-3p/ILK
Source: PubMed Central journal article supplement (PMC9012350; doi:10.1371/journal.pone.0265901), 2022-04-15

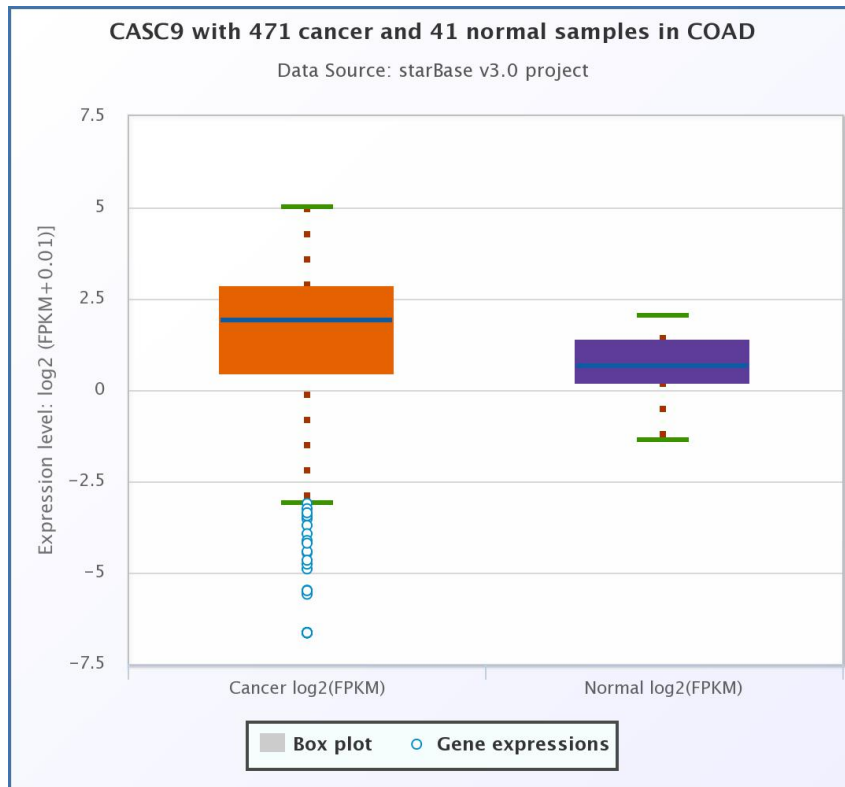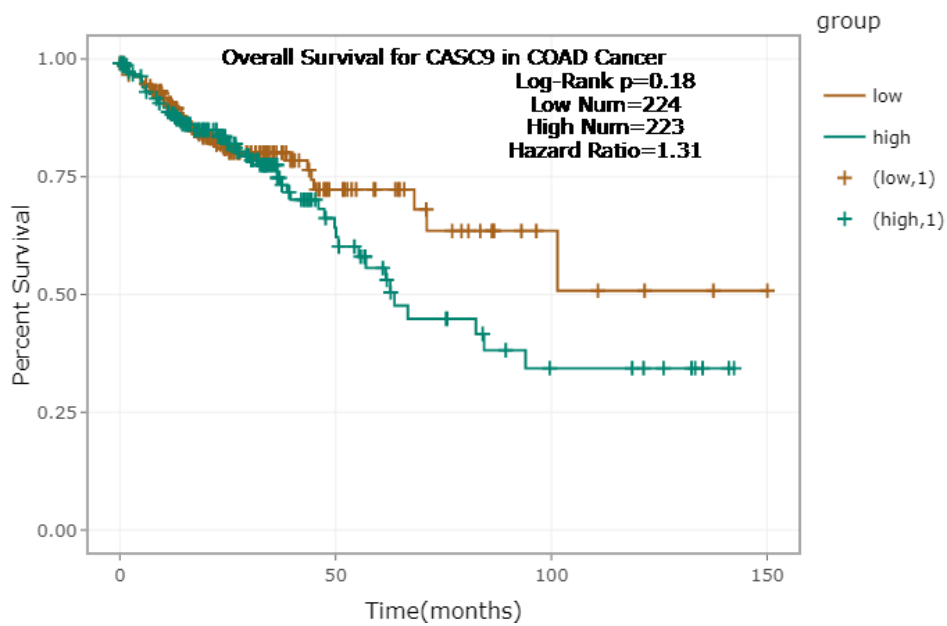

### Overall Survival

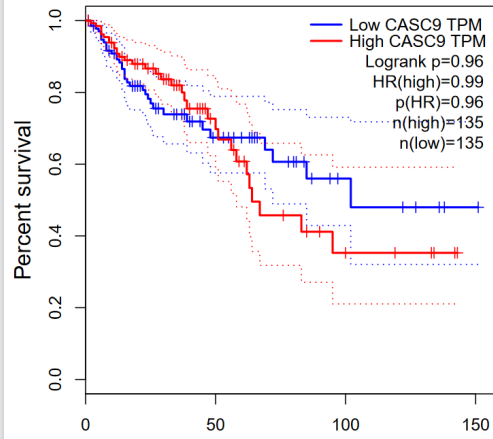

### Overall Survival

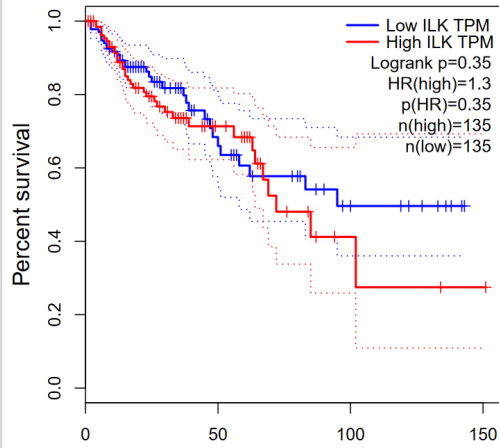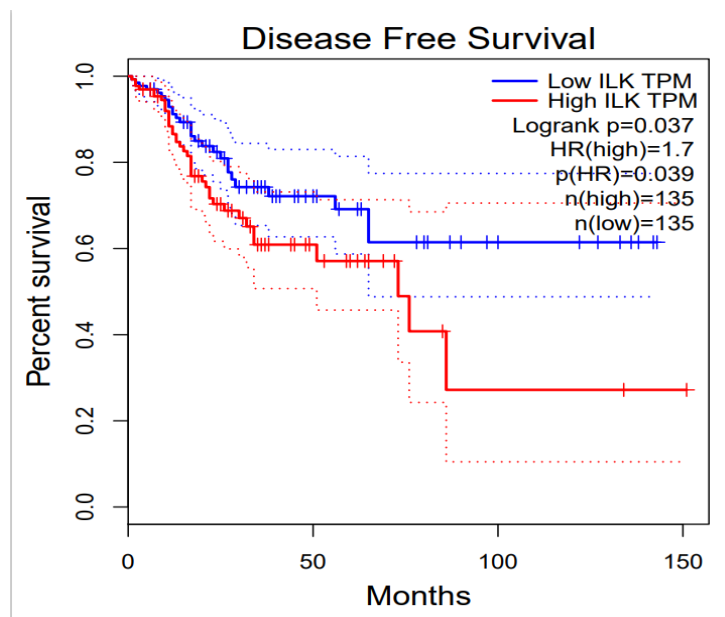

Effect of ILK expression level on COAD patient survival

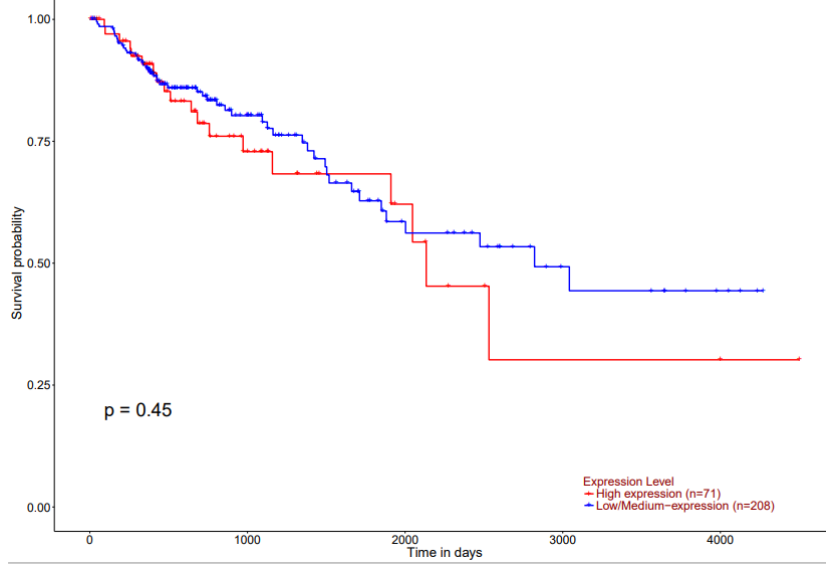

Supplement: pone.0265901.s003.pdf [file pone.0265901.s003.pdf]
